# Supplementary material
Source: PubMed Central journal article supplement (PMC5454104)
Supplement: 10.1074_M117.783092_jbc.M117.783092-1.pdf [file 10.1074_M117.783092_jbc.M117.783092-1.pdf]

### Supplementary Information for

Glutamate 52- $\beta$  at the  $\alpha/\beta$  Subunit Interface of *E. coli* Class Ia Ribonucleotide Reductase is essential for Conformational Gating of Radical Transfer

**Qinghui Lin<sup>1,\*</sup>, Mackenzie J. Parker<sup>2,\*</sup>, Alexander T. Taguchi<sup>2,\*</sup>, Kanchana Ravichandran<sup>2</sup>, Albert Kim<sup>2</sup>, Gyunhoog Kang<sup>2</sup>, Jimin Shao<sup>1</sup>, Catherine L. Drennan<sup>2,3,4,#</sup>, JoAnne Stubbe<sup>2,3,#</sup>**

From <sup>1</sup>Department of Pathology and Pathophysiology, Zhejiang University School of Medicine, Hangzhou 310058, China, the Departments of <sup>2</sup>Chemistry, <sup>3</sup>Biology, and <sup>4</sup>Howard Hughes Medical Institute, Massachusetts Institute of Technology, Cambridge, Massachusetts 02139

Running title: Importance of Glutamate 52 in  $\beta$  of Class Ia RNR

#To whom correspondence should be addressed:

Catherine L. Drennan, Depts. of Biology and Chemistry, Howard Hughes Medical Institute, Massachusetts Institute of Technology, 77 Massachusetts Ave., Cambridge, MA 02139. Tel.: 617-253-5622; Fax: 617-258-7847; E-mail: [cdrennan@mit.edu](mailto:cdrennan@mit.edu)

JoAnne Stubbe, Depts. of Chemistry and Biology, Massachusetts Institute of Technology, 77 Massachusetts Ave., Cambridge, MA 02139. Tel.: 617-253-1814; Fax: 617-324-0505; E-mail: [stubbe@mit.edu](mailto:stubbe@mit.edu).

#### Contents

Table S1 Primers and plasmids utilized in this study.

Figure S1 Quality analysis of the proteins by 10% SDS-PAGE.

Figure S2 A putative H-bonding network in the *E. coli* class Ia RNRs linking the S-site in  $\alpha 2$  with the diferric-Y• cofactor in  $\beta 2$  that may form a part of the triggering mechanism for radical initiation of nucleotide reduction.

Figure S3 A putative role for R639 in *E. coli* RNR.

**Table S1** Primers and plasmids utilized in this study.

| Plasmid                                                 | Gene product                                           | Template                                  | Primer | Sequence                                |
|---------------------------------------------------------|--------------------------------------------------------|-------------------------------------------|--------|-----------------------------------------|
| pTB2- <i>nrdB</i> -GCA <sub>52</sub>                    | E <sub>52</sub> A-β2                                   | pTB2- <i>nrdB</i> (1)                     | Fw     | CTGGCGTCCGAAGCAGTTGACGTCT               |
|                                                         |                                                        |                                           | Rv     | GCGGGAGACGTCAACTGCTTCCGGA               |
| pTB2- <i>nrdB</i> -GAT <sub>52</sub>                    | E <sub>52</sub> D-β2                                   | pTB2- <i>nrdB</i> (1)                     | Fw     | CTGGCGTCCGAAGATGTTGACGTCT               |
|                                                         |                                                        |                                           | Rv     | GCGGGAGACGTCAACATCTTCCGGA               |
| pTB2- <i>nrdB</i> -CAA <sub>52</sub>                    | E <sub>52</sub> Q-β2                                   | pTB2- <i>nrdB</i> (1)                     | Fw     | CTGGCGTCCGAACAAGTTGACGTCT               |
|                                                         |                                                        |                                           | Rv     | GCGGGAGACGTCAACTTGTTCGGA                |
| pBAD- <i>nrdB</i> -CAA <sub>52</sub> TAG <sub>122</sub> | E <sub>52</sub> Q/F <sub>3</sub> Y <sub>122</sub> •-β2 | pBAD- <i>nrdB</i> -TAG <sub>122</sub> (2) | Fw     | CTGGCGTCCGAACAAGTTGACGTCT               |
|                                                         |                                                        |                                           | Rv     | GCGGGAGACGTCAACTTGTTCGGA                |
| pET28a- <i>nrdA</i> -GCT <sub>329</sub>                 | R <sub>329</sub> A-β2                                  | pET28a- <i>nrdA</i> (3)                   | Fw     | GTGTGGAAGGCAACGCTGTGCGTCATATGGAC        |
|                                                         |                                                        |                                           | Rv     | GTCCATATGACGCACAGCGTTGCCTTCCACAC        |
| pET28a- <i>nrdA</i> -AAG <sub>329</sub>                 | R <sub>329</sub> K-α2                                  | pET28a- <i>nrdA</i> (3)                   | Fw     | GTGTGGAAGGCAACAAGGTGCGTCATATGGAC        |
|                                                         |                                                        |                                           | Rv     | GTCCATATGACGCACCTTGTTCCTTCCACAC         |
| pET28a- <i>nrdA</i> -CAG <sub>329</sub>                 | R <sub>329</sub> Q-α2                                  | pET28a- <i>nrdA</i> (3)                   | Fw     | GTGTGGAAGGCAACCAGGTGCGTCATATGGAC        |
|                                                         |                                                        |                                           | Rv     | GTCCATATGACGCACCTGTTGCCTTCCACAC         |
| pET28a- <i>nrdA</i> -AAG <sub>323</sub>                 | R <sub>323</sub> K-α2                                  | pET28a- <i>nrdA</i> (3)                   | Fw     | CTGGTGTGAAAAACAACAAGGGTGTGGAAGGCAACCG   |
|                                                         |                                                        |                                           | Rv     | CGGTTGCCTTCCACACCCTTGTGTTGTTTTCAACACCAG |
| pET28a- <i>nrdA</i> -CAG <sub>639</sub>                 | R <sub>639</sub> Q-α2                                  | pET28a- <i>nrdA</i> (3)                   | Fw     | CGGTATTGAACCGCCGCAGGGTTACGTCAGCATC      |
|                                                         |                                                        |                                           | Rv     | GATGCTGACGTAACCCTGCGGCGTTCAATACCG       |
| pET28a- <i>nrdA</i> -CAG <sub>735</sub>                 | R <sub>735</sub> Q-α2                                  | pET28a- <i>nrdA</i> (3)                   | Fw     | GTATTATCAGAACACCAGGACGGCGCTGAAGAC       |
|                                                         |                                                        |                                           | Rv     | GTCTTCAGCGCCGTCCTGGGTGTTCTGATAATAC      |
|                                                         |                                                        |                                           | Rv     | GAAAAGATCTCTGGCCTGCTGCTCTTCCTTTCCTGTG   |

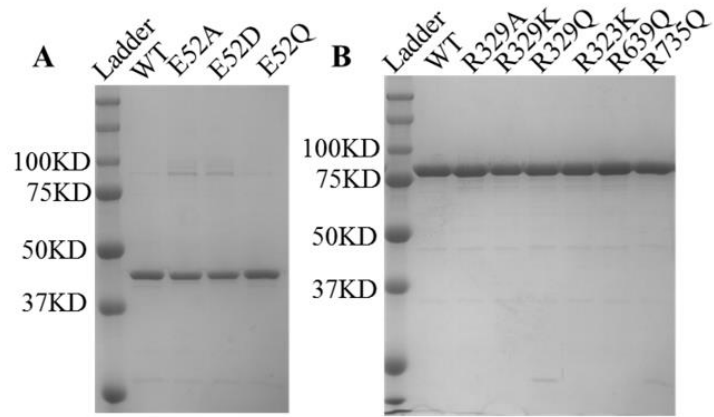

**Figure S1** Analysis of mutant protein purity by 10% SDS-PAGE. **(A)** The WT and mutants of  $\beta 2$  of *E. coli* purified by DEAE fast flow anion exchange and Q-sepharose columns. **(B)** The WT and mutants of  $\alpha 2$  of *E. coli* purified by a Ni-NTA resin column.

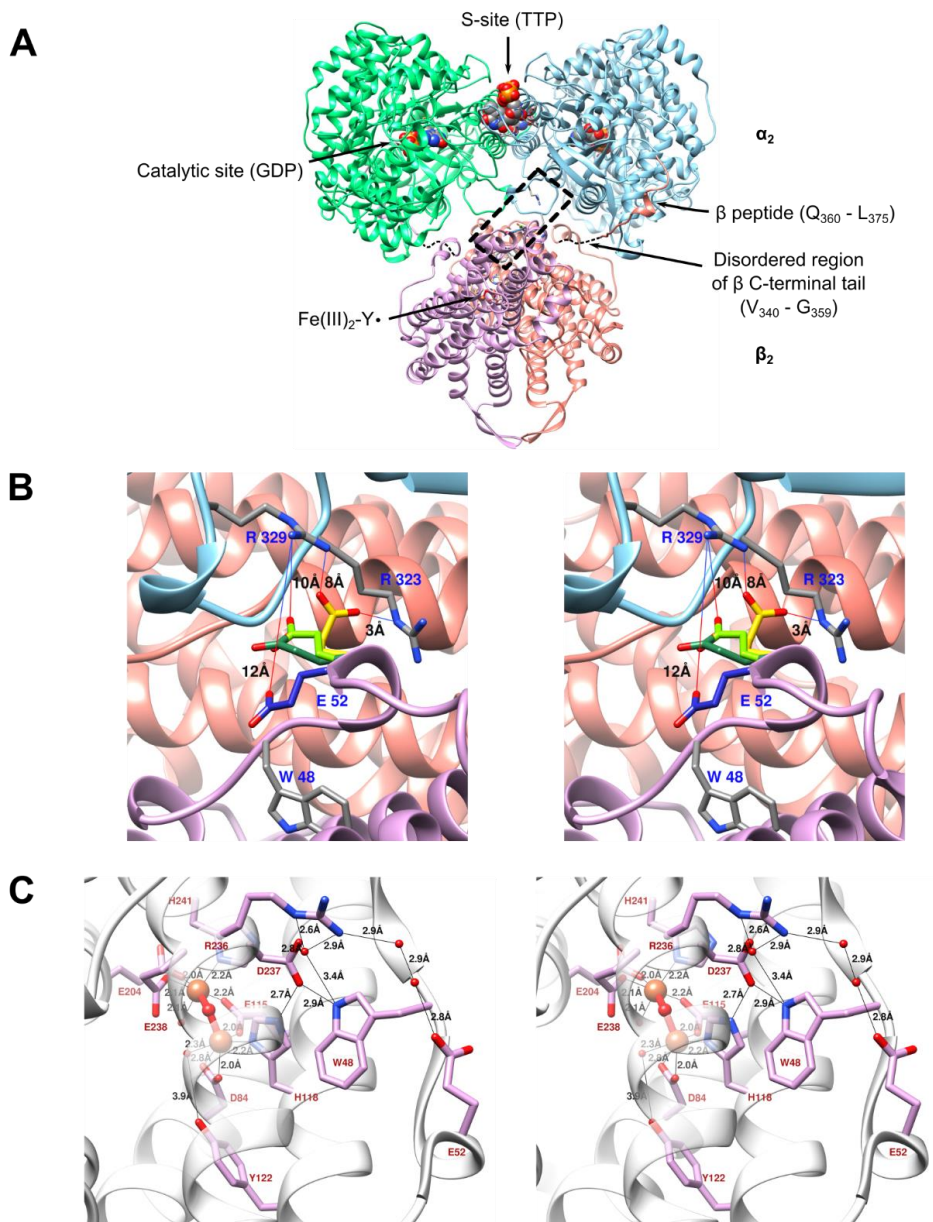

**Figure S2** A putative H-bonding network in the *E. coli* class Ia RNRs linking the S-site in  $\alpha_2$  with the diferric-Y• cofactor in  $\beta_2$  that may form a part of the triggering mechanism for radical initiation of nucleotide reduction. **(A)** A docking model of the *E. coli* RNR ( $\alpha_2$  = PDB 4R1R in green and cyan ribbons;  $\beta_2$  = PDB 1MXR in pink and purple ribbons) with the region containing the putative H-bonding network involved in RT at the subunit interface indicated by the dashed rectangle. GDP and TTP (shown as space-filling models) occupy the catalytic-sites (C-site) and specificity-sites (S-site), respectively, and are colored according to element (gray = C, blue = N, red = O, orange = P). **(B)** Stereo image showing putative locations of  $\beta$  residues E52 (colored as described below) and W<sub>48</sub> (grey) and  $\alpha$  residues R<sub>323</sub> (grey) and R<sub>329</sub> (grey) in the docking model.  $\beta$  is shown as pink, purple ribbons and  $\alpha$  in cyan ribbons. A comparison of  $\beta_2$  X-ray structures

reveals E<sub>52</sub> can adopt a range of conformations designated “in” (blue C atoms(4)), “intermediate” (green C atoms(5) (6)), and “out” (yellow C atoms(7)). In this docking model, the “out” conformation of E<sub>52</sub> is close to loop 3 of  $\alpha$  (cyan), which contains R<sub>323</sub> and R<sub>329</sub> suggesting a possible route for signal transmission between the RNR subunits. R<sub>329</sub> is highly conserved. (C) Stereo image of hydrogen bonding interactions within  $\beta$ .  $\beta$  is shown in grey ribbons with iron atoms shown in orange spheres. E<sub>52</sub> in the “in” conformation hydrogen bonds to R<sub>236</sub> via a water bridge (PDB ID code 1MXR). R<sub>236</sub> also makes through water contacts with residues that are linked by hydrogen-bonding to the di-iron site.

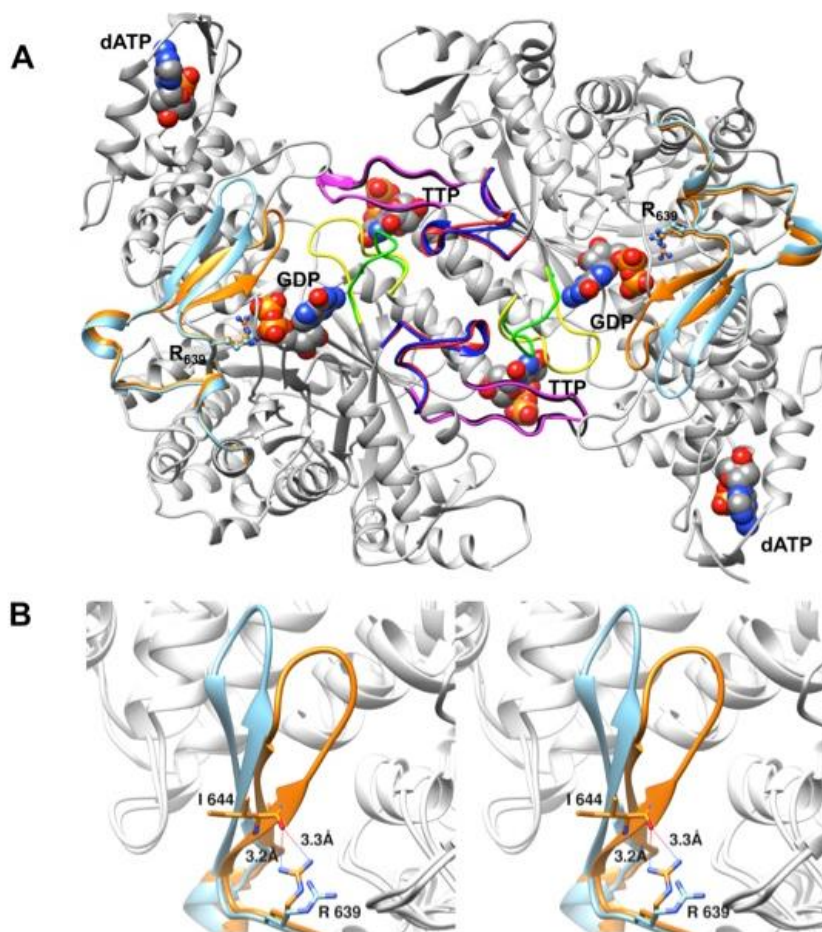

**Figure S3** A putative role for R<sub>639</sub> in *E. coli* RNR. **(A)** Overlay of *E. coli*  $\alpha 2$  structures in the substrate-free (PDB 4R1R,  $\beta$ -hairpin in blue) and substrate-bound (PDB 5CNV,  $\beta$ -hairpin in orange) state. Shown is the surface of  $\alpha 2$  that interacts with  $\beta 2$  in the active complex. Upon binding of substrate and effector, the  $\beta$ -hairpin rotates in towards the middle of the 10-stranded barrel, presumably to help seal off the catalytic site from solvent during turnover. Loops 1 (magenta), 2 (yellow), and 3 (blue), are involved in S/e binding. Nucleotides are shown as space-filling models and colored according to element (gray = C, blue = N, red = O, orange = P). **(B)** Stereo image showing the conformational changes of R<sub>639</sub> and the  $\beta$ -hairpin that occur during conversion of the substrate-free to substrate-bound states of  $\alpha$ . In this view, the sidechain of R<sub>639</sub> rotates  $\sim 5^\circ$  counterclockwise about the C $\beta$  – C $\alpha$  and  $\sim 47^\circ$  counterclockwise about the C $\delta$  – C $\gamma$  bonds to form hydrogen bonds with the backbone carbonyl of I<sub>644</sub> and, thus, likely help hold the  $\beta$ -hairpin in the closed conformation. Atoms and bonds are shown as stick models and colored according to heteroatom.

## References

1. Salowe, S. P., and Stubbe, J. (1986) Cloning, overproduction, and purification of the B2 subunit of ribonucleoside-diphosphate reductase. *J. Bacteriol.* **165**, 363-366
2. Yokoyama, K., Uhlin, U., and Stubbe, J. (2010) A hot oxidant, 3-NO<sub>2</sub>Y<sub>122</sub> radical, unmasks conformational gating in ribonucleotide reductase. *J. Am. Chem. Soc.* **132**, 15368-15379
3. Minnihhan, E. C., Seyedsayamdost, M. R., Uhlin, U., and Stubbe, J. (2011) Kinetics of radical intermediate formation and deoxynucleotide production in 3-aminotyrosine-substituted Escherichia coli ribonucleotide reductases. *J. Am. Chem. Soc.* **133**, 9430-9440
4. Oyala, P. H., Ravichandran, K. R., Funk, M. A., Stucky, P., Stich, T. A., Drennan, C. L., Britt, R. D., and Stubbe, J. (2016) Biophysical characterization of fluorotyrosine probes site-specifically incorporated into enzymes: E. coli ribonucleotide reductase as an example. *J. Am. Chem. Soc.* **138**, 7951-7964
5. Assarsson, M., Andersson, M. E., Hogbom, M., Persson, B. O., Sahlin, M., Barra, A. L., Sjoberg, B. M., Nordlund, P., and Graslund, A. (2001) Restoring proper radical generation by azide binding to the iron site of the E238A mutant R2 protein of ribonucleotide reductase from Escherichia coli. *J Biol Chem* **276**, 26852-26859
6. Hogbom, M., Galander, M., Andersson, M., Kolberg, M., Hofbauer, W., Lassmann, G., Nordlund, P., and Lendzian, F. (2003) Displacement of the tyrosyl radical cofactor in ribonucleotide reductase obtained by single-crystal high-field EPR and 1.4-A x-ray data. *Proc. Natl. Acad. Sci. U S A* **100**, 3209-3214
7. Tong, W., Burdi, D., Riggs-Gelasco, P., Chen, S., Edmondson, D., Huynh, B. H., Stubbe, J., Han, S., Arvai, A., and Tainer, J. (1998) Characterization of Y122F R2 of Escherichia coli ribonucleotide reductase by time-resolved physical biochemical methods and X-ray crystallography. *Biochemistry* **37**, 5840-5848
